# Supplementary material for: Unraveling the Molecular Mechanism of Selective Antimicrobial Activity of 2(5H)-Furanone Derivative against Staphylococcus aureus
Source: PubMed Central journal article supplement (PMC6387044; doi:10.3390/ijms20030694), 2019-02-06
Supplement: ijms-20-00694-s001.pdf [file ijms-20-00694-s001.pdf]

## *Supplementary Material*

# **Unraveling the molecular mechanism of selective antimicrobial activity of 2(5*H*)-furanone derivative against *Staphylococcus aureus***

Irshad S Sharafutdinov, Anna S Pavlova, Farida S Akhatova, Alsu M Khabibrakhmanova, Elvira V Rozhina, Yulia J Romanova, Ravil F Fakhrullin, Olga A Lodochnikova, Almira R Kurbangalieva, Mikhail I Bogachev, Airat R Kayumov

## 1. Chemistry

### 1.1. Synthetic procedures

**1.1.1. 5-[2-(Benzothiazol-2-yl)-4-bromophenoxy]-3,4-dichloro-2(5H)-furanone (4).** To a stirred solution of furanone **2** (0.30 g, 1.3 mmol) in dichloromethane (18 mL) at room temperature was added CsF (0.26 g, 1.7 mmol) under an Ar atmosphere. Then a solution of phenol **3** (0.45 g, 1.5 mmol) in dichloromethane (12 mL) was added. The reaction mixture was heated at reflux for 24 h. After cooling, the reaction mixture was evaporated to dryness under reduced pressure and the obtained yellow residue was purified by silica gel column chromatography using toluene as the eluent. From the first nonpolar fraction, unreacted phenol **3** (0.17 g, 38%) was recovered. The second fraction contained the desired product **4** (0.20 g, 34%) as colorless solid, mp 210–212 °C (decomp.). TLC  $R_f$  0.29 (toluene). IR,  $\nu$ ,  $\text{cm}^{-1}$ : 1797 (C=O), 1644 (C=C<sub>lactone</sub>), 1490, 1457 (C=C<sub>arom</sub>).  $^1\text{H}$  NMR,  $\delta$ , ppm: 6.47 (s, 1H, H<sup>5</sup>), 7.25 (d,  $J$  = 6.7 Hz, 1H), 7.39–7.48 (m, 1H), 7.49–7.58 (m, 1H), 7.62 (dd,  $J$  = 8.8, 2.0 Hz, 1H), 7.95 (d,  $J$  = 8.1 Hz, 1H), 8.12 (d,  $J$  = 8.1 Hz, 1H), 8.66 (d,  $J$  = 2.1 Hz, 1H).  $^{13}\text{C}\{^1\text{H}\}$  NMR,  $\delta$ , ppm: 98.54 (C<sup>5</sup>), 117.54, 117.91, 121.57, 123.53, 125.69, 126.63, 133.23, 134.55, 136.18, 146.52, 152.14, 152.23, 160.28, 162.32 (C<sup>2</sup>, C<sup>3</sup>, C<sup>4</sup>, C<sub>arom</sub>). HRMS (ESI)  $m/z$  calcd for C<sub>17</sub>H<sub>9</sub>BrCl<sub>2</sub>NO<sub>3</sub>S ([M+H]<sup>+</sup>) 455.8858, found 455.8857.

**1.1.2. 5-[2-(Benzothiazol-2-yl)-4-bromophenoxy]-3-chloro-4-[(4-methylphenyl)sulfanyl]-2(5H)-furanone (5).** To a solution of furanone **4** (0.14 g, 0.3 mmol) in dichloromethane (10 mL) with intense stirring was added dropwise a solution of 4-methylthiophenol (0.04 g, 0.3 mmol) in dichloromethane (3 mL), and a solution of triethylamine (0.04 mL, 0.3 mmol) in dichloromethane (1 mL). The reaction mixture was stirred at room temperature for 24 h, then washed with water (30 mL  $\times$  3), and the aqueous layer was extracted with dichloromethane (30 mL  $\times$  3). The combined organic layers were dried over MgSO<sub>4</sub>, and the solvent was removed under reduced pressure. The obtained solid residue was recrystallized from hexane to afford thioether **5** (0.14 g, 85%) as colorless solid, mp 175 °C. TLC  $R_f$  0.25 (ethyl acetate / petroleum ether, 1:6). IR,  $\nu$ ,  $\text{cm}^{-1}$ : 1769 (C=O), 1583, 1491, 1456 (C=C<sub>arom</sub>).  $^1\text{H}$  NMR,  $\delta$ , ppm: 2.24 (s, 3H, CH<sub>3</sub>), 6.15 (s, 1H, H<sup>5</sup>), 6.64, 6.97 (m, AA'BB',  $N = {}^3J_{AB} + {}^5J_{AB'} = 8.4$  Hz, 4H), 7.25 (d,  $J$  = 7.6 Hz, 1H), 7.40 (dd,  $J$  = 8.9, 2.5 Hz, 1H), 7.43–7.50 (m, 1H), 7.52–7.60 (m, 1H), 8.01 (d,  $J$  = 8.1 Hz, 1H), 8.14 (d,  $J$  = 8.1 Hz, 1H), 8.61 (d,  $J$  = 2.5 Hz, 1H).  $^{13}\text{C}\{^1\text{H}\}$  NMR,  $\delta$ , ppm: 21.32 (CH<sub>3</sub>), 97.37 (C<sup>5</sup>), 115.74, 116.85, 118.08, 121.20, 121.70, 123.38, 125.24, 125.64, 126.59, 130.63, 132.70, 134.09, 135.17, 136.21, 141.56, 151.95, 152.06, 155.35, 160.56, 163.81 (C<sup>2</sup>, C<sup>3</sup>, C<sup>4</sup>, C<sub>arom</sub>). HRMS (ESI)  $m/z$  calcd for C<sub>24</sub>H<sub>16</sub>BrClNO<sub>3</sub>S<sub>2</sub> ([M+H]<sup>+</sup>) 543.9438, found 543.9438.

1.1.3. **5-[2-(Benzothiazol-2-yl)-4-bromophenoxy]-3-chloro-4-[(4-methylphenyl)sulfonyl]-2(5H)-furanone (6).** To a stirred solution of thioether **5** (0.11 g, 0.2 mmol) in dichloromethane (10 mL) was added dropwise a solution of *m*-chloroperoxybenzoic acid (0.09 g, 0.5 mmol) in dichloromethane (6 mL). The mixture was stirred for 7 h at room temperature, the progress of the reaction was monitored by <sup>1</sup>H NMR spectroscopy. When the reaction was complete, the mixture was washed first with 6% aqueous sodium bicarbonate and then with water to pH 7. The aqueous layer was extracted with an additional dichloromethane (20 mL × 2), the combined organic layers were dried over calcium chloride, and the solvent was evaporated to dryness. The yellowish solid residue was purified by silica gel column chromatography (ethyl acetate / petroleum ether, 1:6) followed by recrystallization from a mixture hexane / chloroform (5:6) to give sulfone **6** (0.06 g, 52%) as colorless crystals, mp 210–213 °C (decomp.). TLC *R<sub>f</sub>* 0.17 (ethyl acetate / petroleum ether, 1:6). IR, ν, cm<sup>-1</sup>: 1804 (C=O), 1621 (C=C<sub>lactone</sub>), 1585, 1491, 1458 (C=C<sub>arom</sub>), 1335 (SO<sub>2</sub><sup>as</sup>); 1158 (SO<sub>2</sub><sup>s</sup>). <sup>1</sup>H NMR, δ, ppm: 2.04 (s, 3H, CH<sub>3</sub>), 6.99 (s, 1H, H<sup>5</sup>), 7.06, 7.31 (m, AA'BB', *N* = <sup>3</sup>*J*<sub>AB</sub> + <sup>5</sup>*J*<sub>AB'</sub> = 8.5 Hz, 4H), 7.36–7.44 (m, 1H), 7.47–7.55 (m, 1H), 7.66 (dd, *J* = 8.8, 2.4 Hz, 1H), 7.72 (d, *J* = 8.1 Hz, 1H), 7.79 (d, *J* = 8.2 Hz, 1H), 8.09 (d, *J* = 8.1 Hz, 1H), 8.56 (d, *J* = 2.3 Hz, 1H). <sup>13</sup>C{<sup>1</sup>H} NMR, δ, ppm: 21.59 (CH<sub>3</sub>), 97.82 (C<sup>5</sup>), 116.98, 118.05, 121.39, 123.57, 125.70, 126.22, 126.54, 129.09, 130.24, 133.44, 134.69, 134.82, 136.10, 147.60, 150.61, 151.72, 152.05, 157.61, 160.53, 162.17. HRMS (ESI) *m/z* calcd for C<sub>24</sub>H<sub>16</sub>BrClNO<sub>5</sub>S<sub>2</sub> ([M+H]<sup>+</sup>) 575.9336, found 575.9340.

1.2.  $^1\text{H}$  and  $^{13}\text{C}\{^1\text{H}\}$  NMR spectra

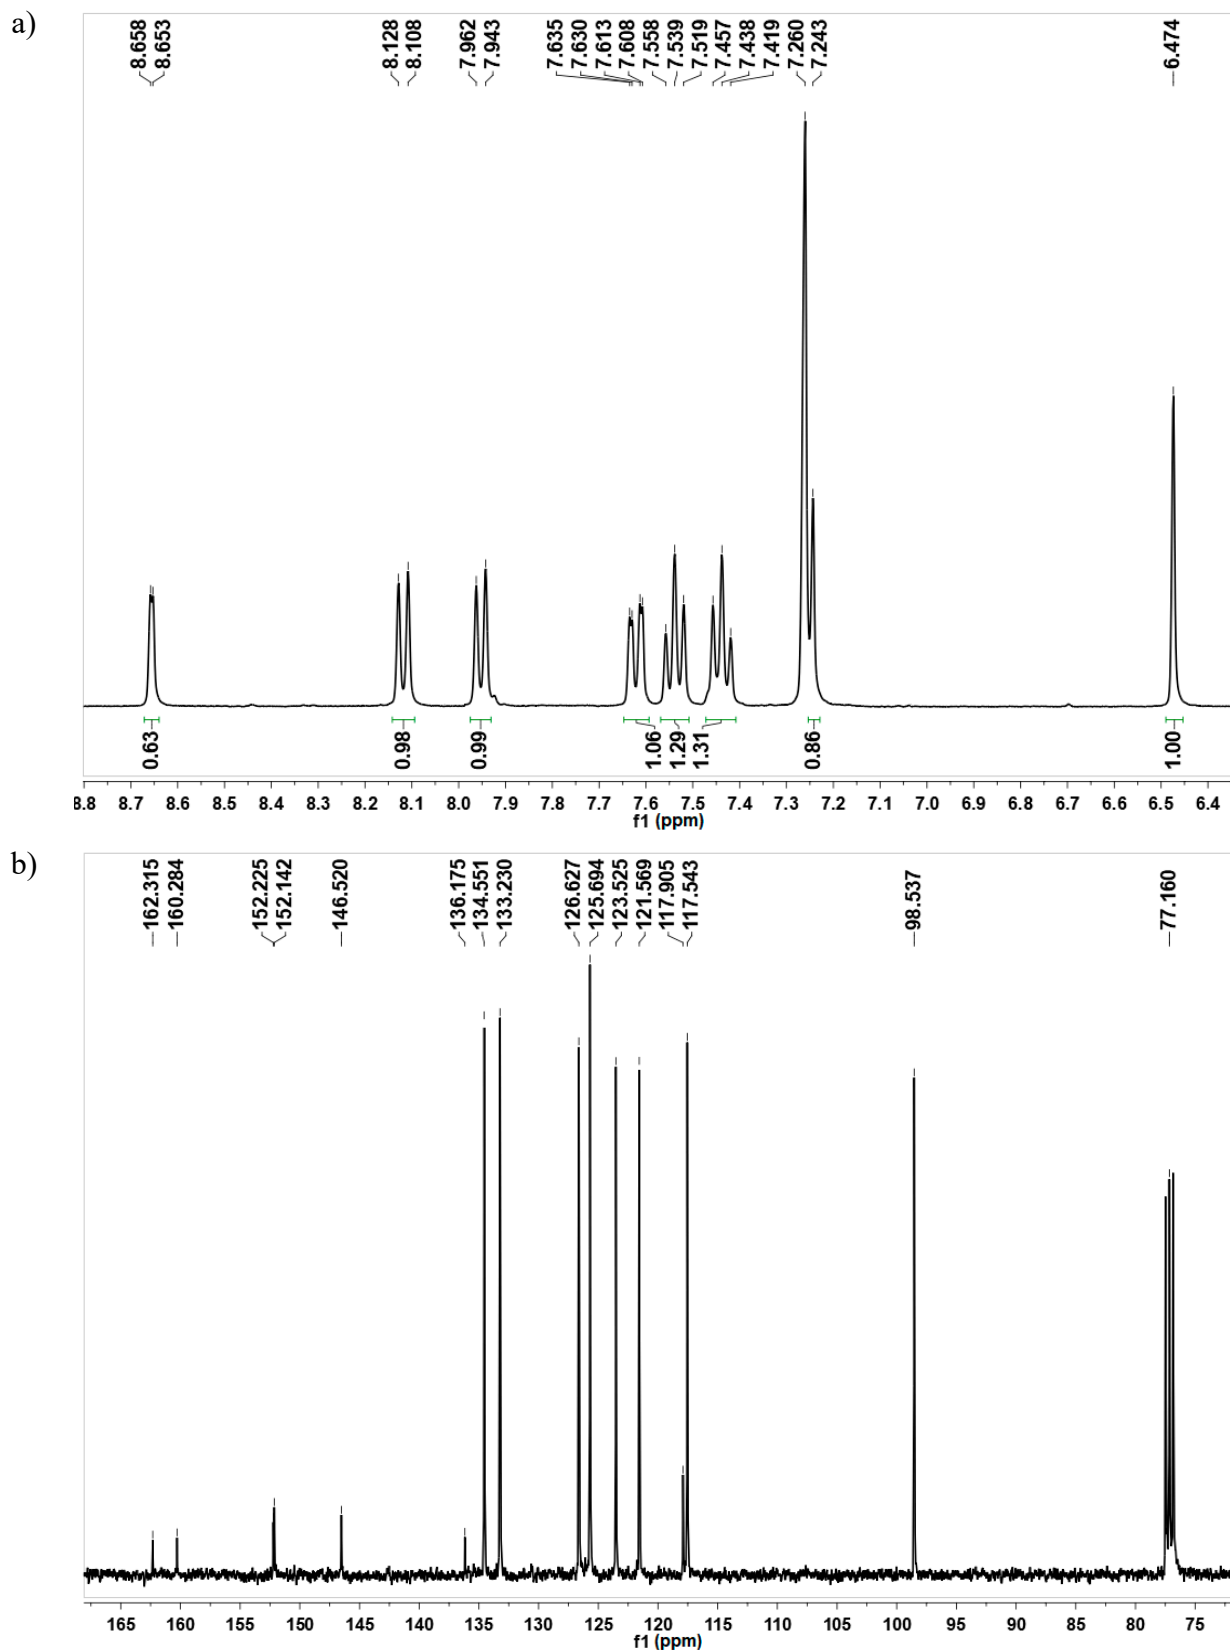

Figure S1.  $^1\text{H}$  (a) and  $^{13}\text{C}\{^1\text{H}\}$  (b) NMR spectra of compound 4 ( $\text{CDCl}_3$ ).

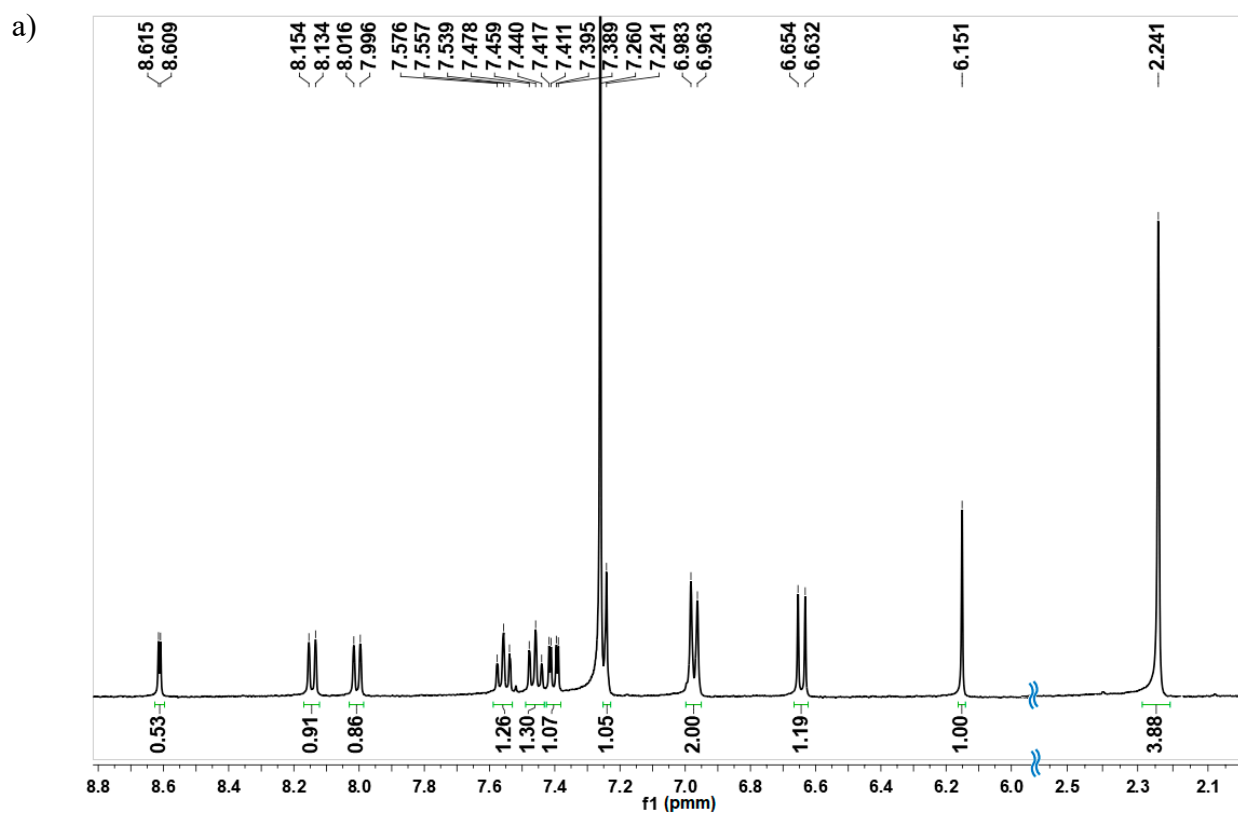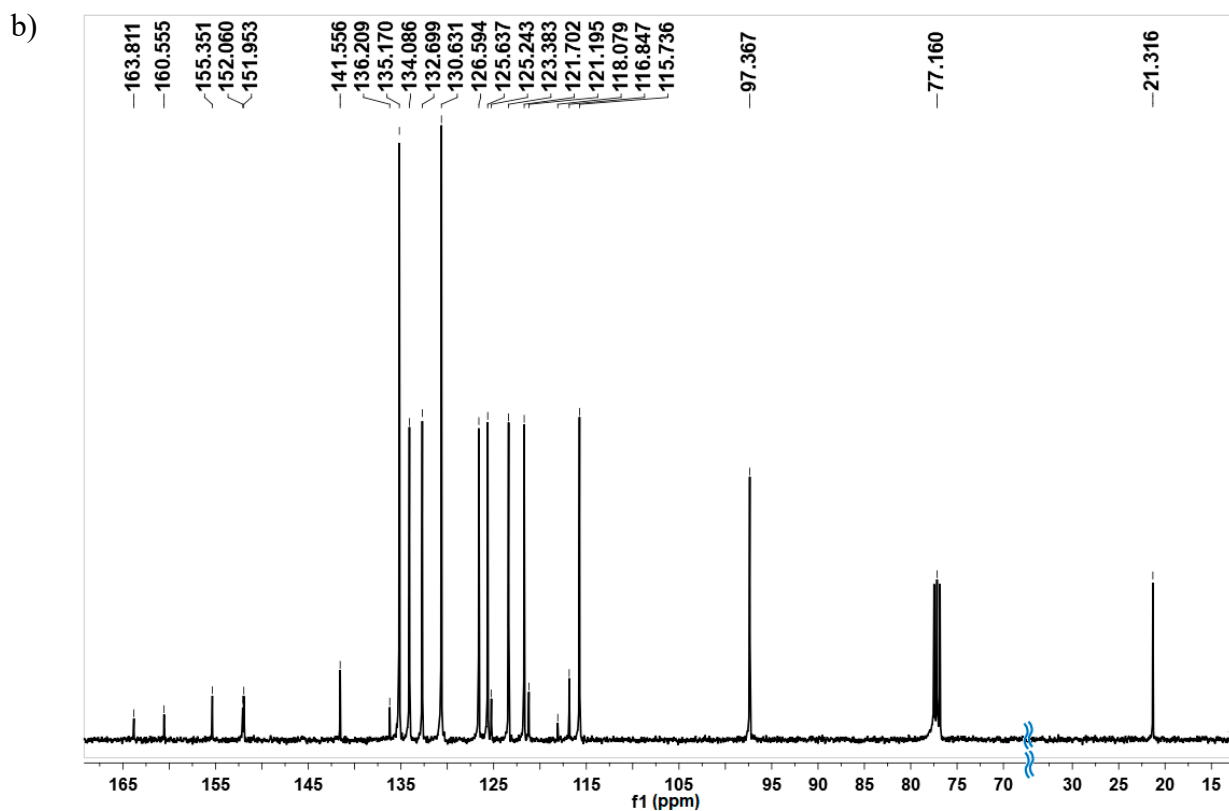

Figure S2.  $^1\text{H}$  (a) and  $^{13}\text{C}\{^1\text{H}\}$  (b) NMR spectra of compound **5** ( $\text{CDCl}_3$ ).

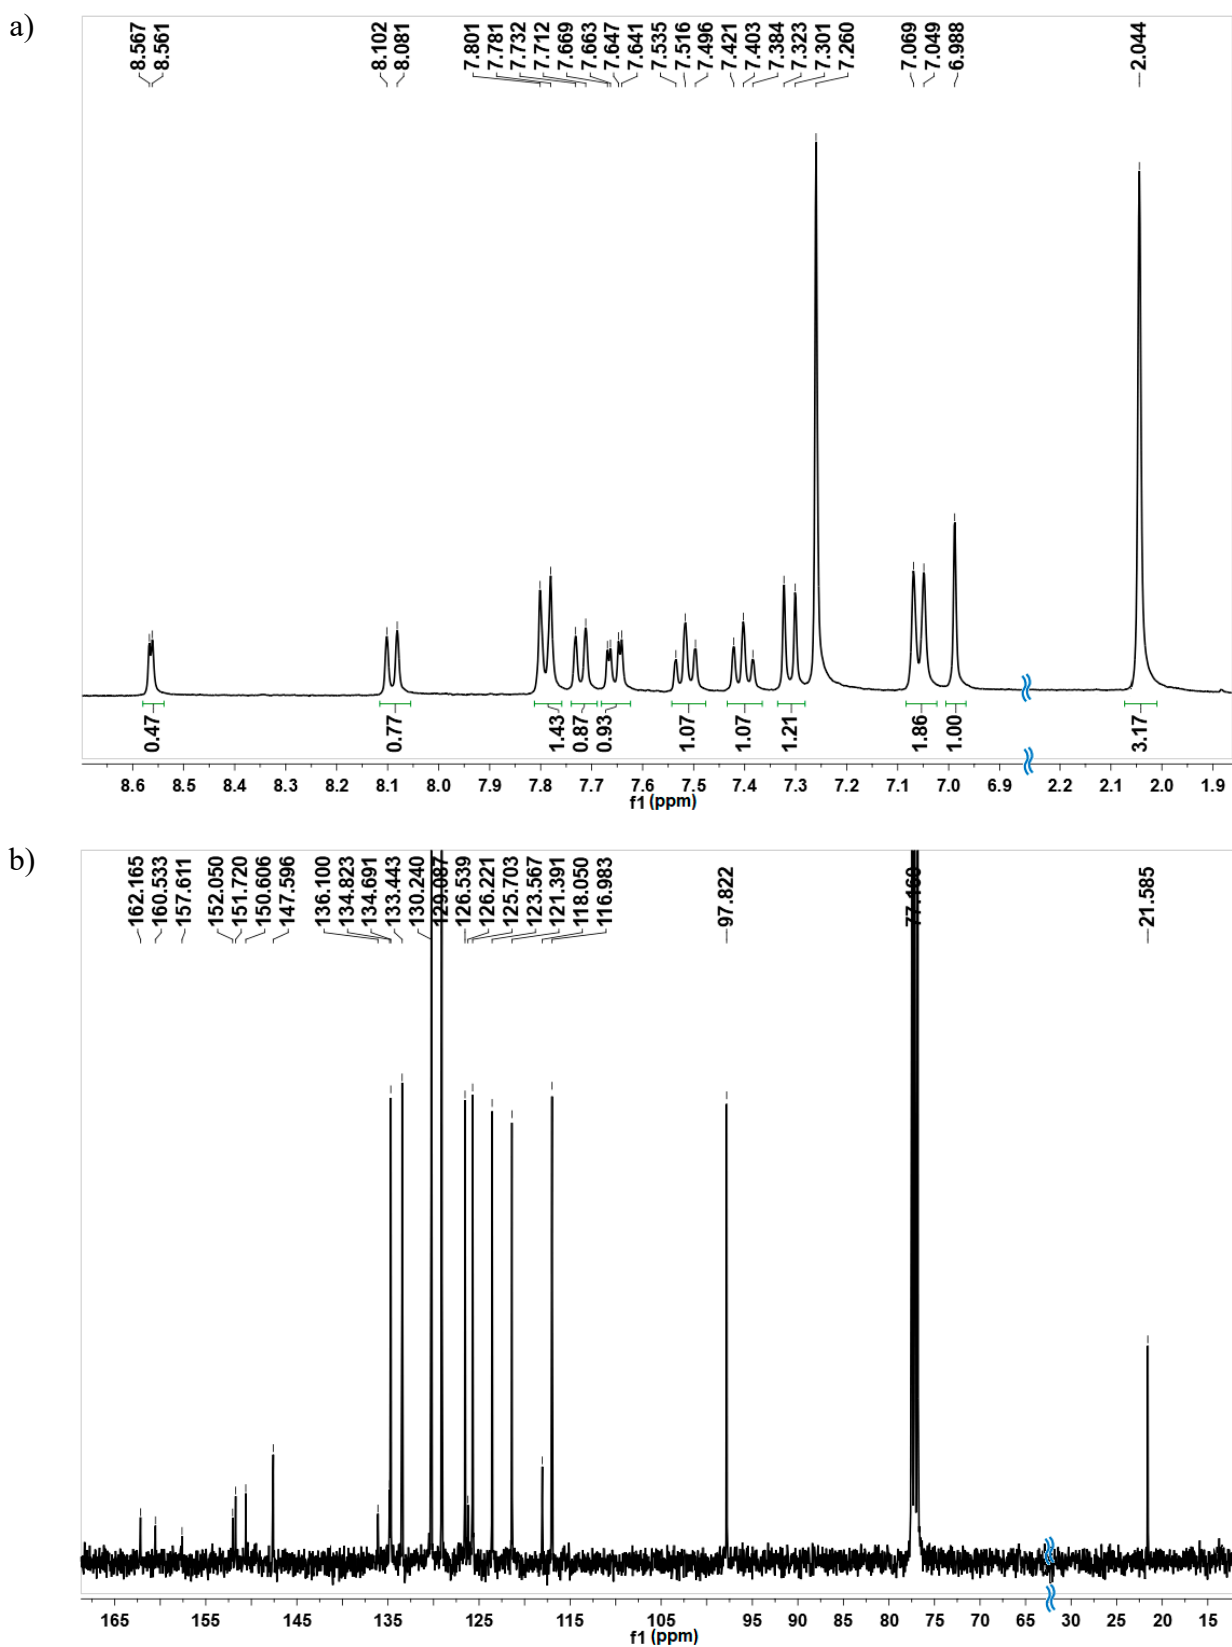

**Figure S3.**  $^1\text{H}$  (a) and  $^{13}\text{C}\{^1\text{H}\}$  (b) NMR spectra of compound **6** ( $\text{CDCl}_3$ ).

### 1.3. Mass spectra

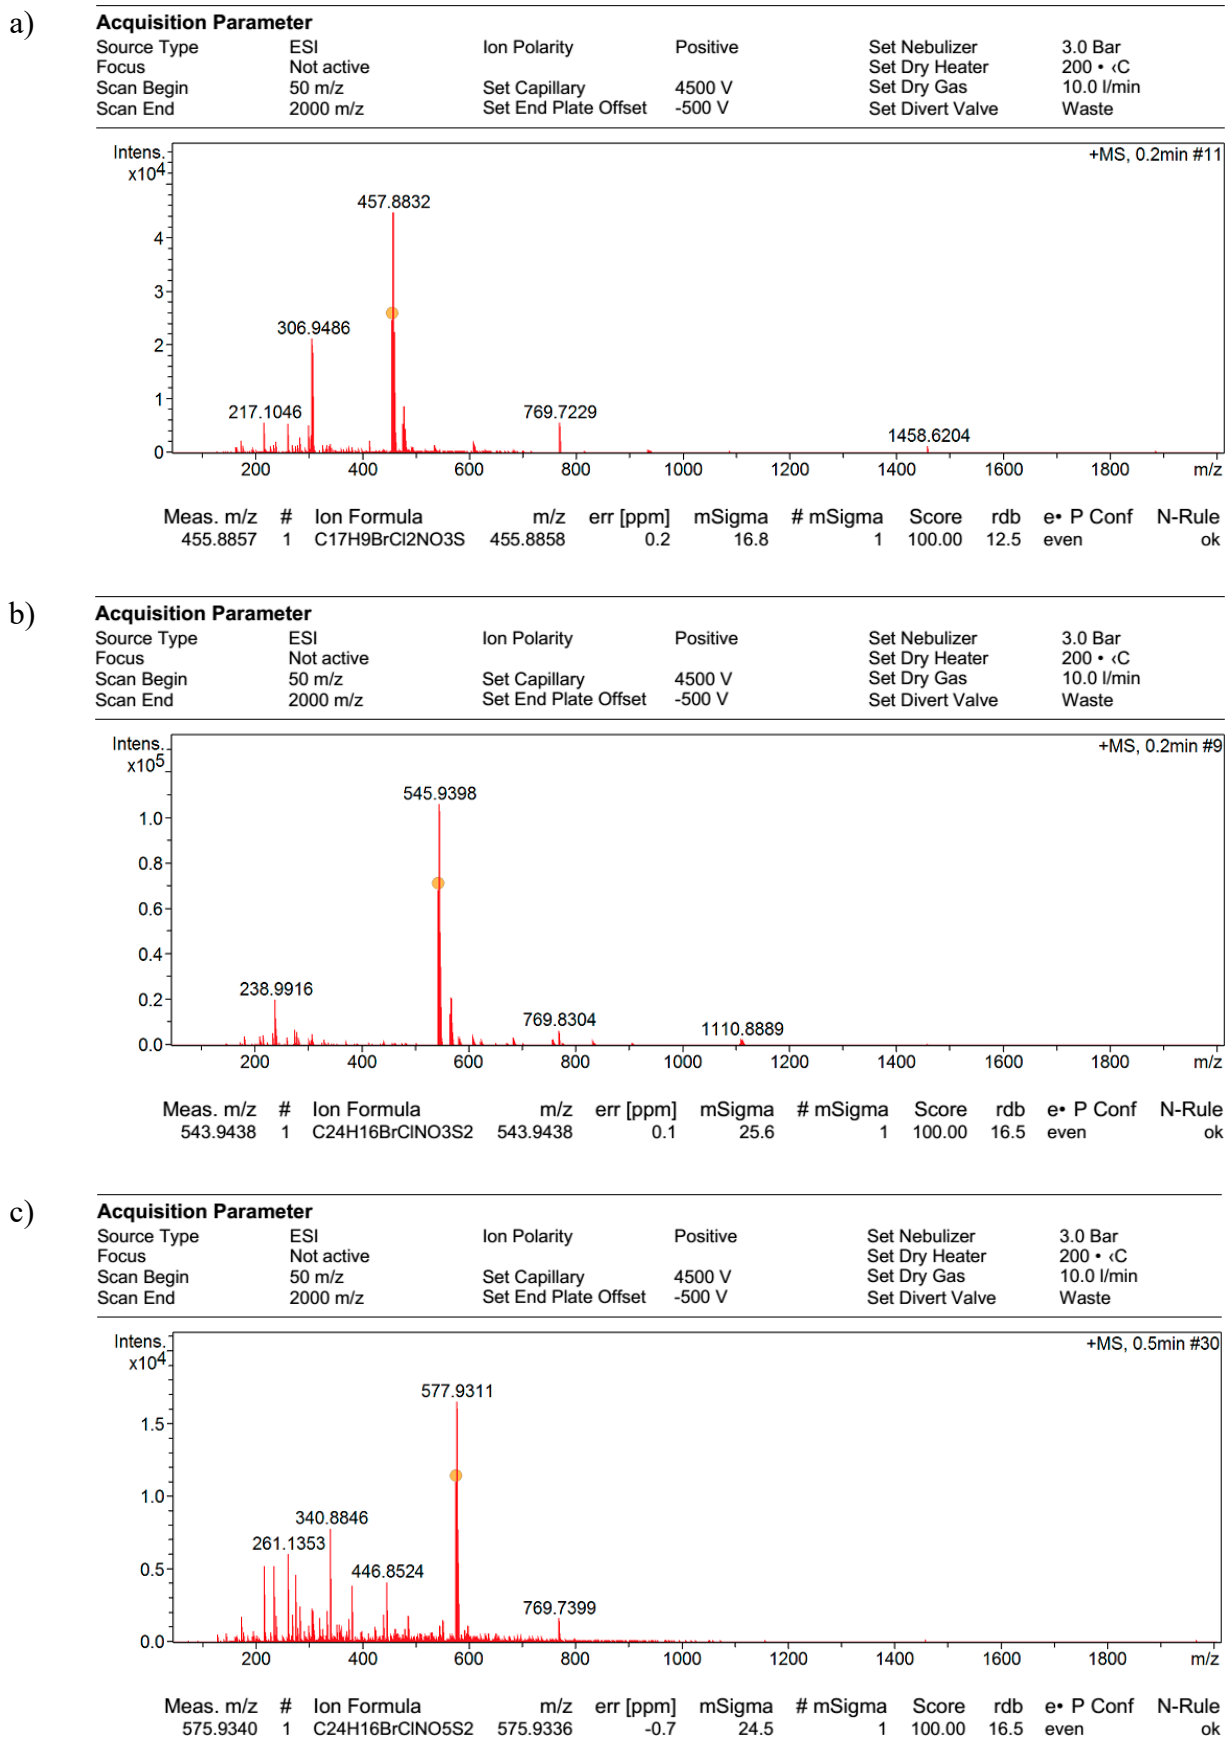

Figure S4. Mass spectra of compounds 4–6.

#### 1.4. Single crystal X-ray analysis

**Table S1.** Crystal data, data collection and structure refinement details for **6 (F145)**

|                                                              |                                                                                                                                                        |
|--------------------------------------------------------------|--------------------------------------------------------------------------------------------------------------------------------------------------------|
| Empirical formula                                            | C <sub>24</sub> H <sub>15</sub> BrClNO <sub>5</sub> S <sub>2</sub> 0.5 CHCl <sub>3</sub>                                                               |
| Formula weight                                               | 636.53                                                                                                                                                 |
| Temperature                                                  | 150(2) K                                                                                                                                               |
| Radiation, wavelength                                        | MoK $\alpha$ , 0.71073 Å                                                                                                                               |
| Crystal system                                               | Triclinic                                                                                                                                              |
| Space group                                                  | <i>P</i> -1 (No. 2)                                                                                                                                    |
| Unit cell dimensions                                         | <i>a</i> = 10.6224(10) Å, <i>b</i> = 10.9807(12) Å,<br><i>c</i> = 11.9831(12) Å, $\alpha$ = 114.055(5)°<br>$\beta$ = 92.733(5)°, $\gamma$ = 98.241(5)° |
| Volume                                                       | 1254.4(2) Å <sup>3</sup>                                                                                                                               |
| <i>Z</i> and <i>Z'</i>                                       | 2 and 1                                                                                                                                                |
| Calculated density                                           | 1.685 g·cm <sup>-3</sup>                                                                                                                               |
| Absorption coefficient                                       | 2.110 mm <sup>-1</sup>                                                                                                                                 |
| <i>F</i> (000)                                               | 638                                                                                                                                                    |
| $\Theta$ range for data collection                           | 3.1° to 28.0°                                                                                                                                          |
| Index ranges                                                 | -14 ≤ <i>h</i> ≤ 14<br>-14 ≤ <i>k</i> ≤ 14<br>-15 ≤ <i>l</i> ≤ 15                                                                                      |
| Reflections collected                                        | 6344                                                                                                                                                   |
| Independent reflections                                      | 31555 [ <i>R</i> (int) = 0.036]                                                                                                                        |
| Observed data [ <i>I</i> > 2 $\sigma$ ( <i>I</i> )]          | 5331                                                                                                                                                   |
| Data / parameters                                            | 6049 / 348                                                                                                                                             |
| Goodness-of-fit on <i>F</i> <sup>2</sup>                     | 1.06                                                                                                                                                   |
| Final <i>R</i> indices [ <i>I</i> > 2 $\sigma$ ( <i>I</i> )] | <i>R</i> <sub>1</sub> = 0.0365, <i>wR</i> <sub>2</sub> = 0.0795                                                                                        |
| <i>R</i> indices (all data)                                  | <i>R</i> <sub>1</sub> = 0.0436, <i>wR</i> <sub>2</sub> = 0.0832                                                                                        |
| Largest diff. peak and hole                                  | -2.53 and 1.98 e·Å <sup>-3</sup>                                                                                                                       |



## 2. Biology

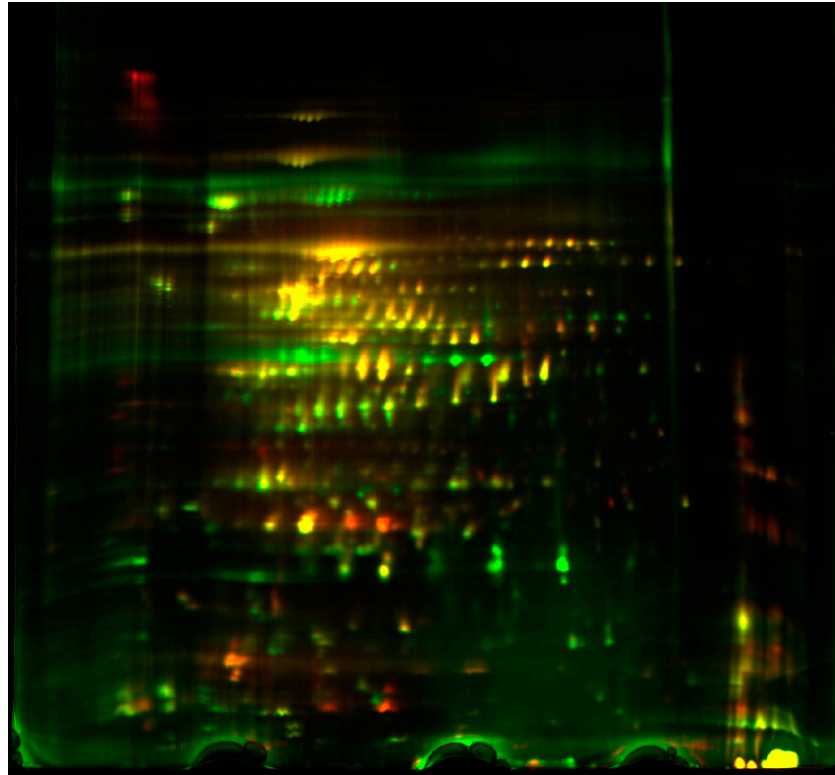

**Figure S5.** 2D electrophoresis of proteome of *S. aureus* cells treated for 24 hours with sub-lethal concentration (8 µg/ml) of F105 (red spots), and untreated (green spots). Overlay of two subpopulations of proteins represents yellow spot

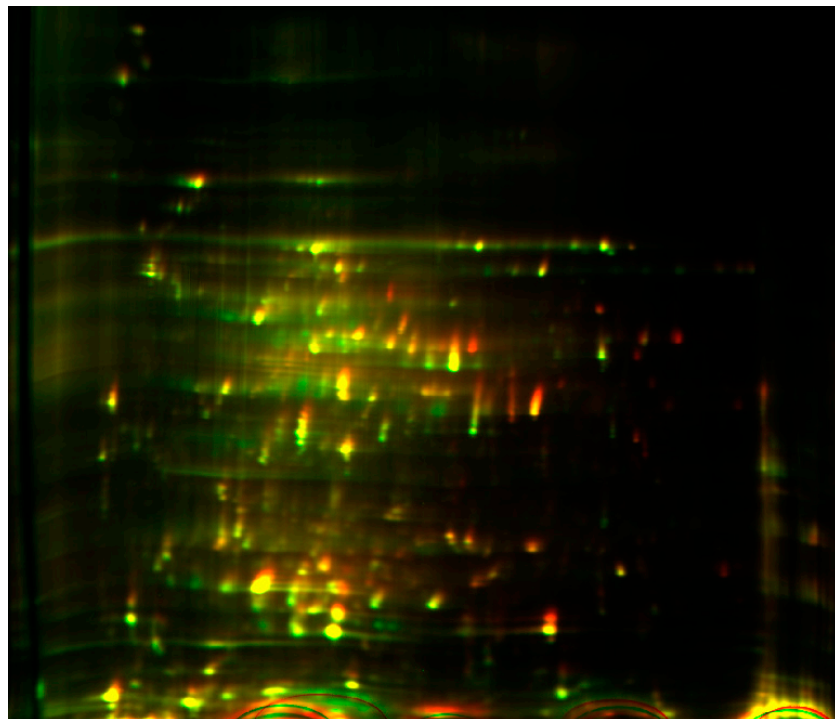

**Figure S6.** 2D electrophoresis of *S. aureus* cell crude extracts after 1-hour treatment with F105 (64 µg/ml) (red spots), and untreated (green spots). Overlay of two subpopulations of proteins represents yellow spot

**Table S2.** Intracellular proteins with decreased amount after growth in the presence of F105 (LC-MS).

| #  | Protein                                                 | Function                                                                                                |
|----|---------------------------------------------------------|---------------------------------------------------------------------------------------------------------|
| 1  | DNA-directed RNA polymerase subunit beta~               | RNA synthesis                                                                                           |
| 2  | Methionine--tRNA ligase                                 | l-methionyl-tRNAMet biosynthesis                                                                        |
| 3  | Molecular chaperone GroEL                               | folding of many proteins                                                                                |
| 4  | Inosine-5-monophosphate dehydrogenase                   | biosynthesis of guanine nucleotides                                                                     |
| 5  | Alkaline phosphatase                                    | Dephosphorylation                                                                                       |
| 6  | Enolase                                                 | glycolysis                                                                                              |
| 7  | Branched-chain alpha-keto acid dehydrogenase subunit E2 | catalyzes a transfer of the acyl group from the lipoyl moiety to coenzyme A (a stoichiometric cofactor) |
| 8  | Thioredoxine reductase                                  | redox signaling, reduction of thioredoxin                                                               |
| 9  | Glycerophosphodiester phosphodiesterase                 | glycerophospholipid metabolism (the main component of biological membranes)                             |
| 10 | Fructose-1,6-bisphosphate aldolase                      | glycolysis                                                                                              |
| 11 | 30S ribosomal protein S3                                | binds mRNA in the 70S ribosome, positioning it for translation                                          |
| 12 | Fibrinogen-binding protein                              | cell surface-bound protein; virulence factor                                                            |
| 13 | Thioredoxin                                             | reduction of other proteins by cysteine thiol-disulfide exchange                                        |

**Table S3.** Intracellular proteins with increased amount after growth in the presence of F105 (LC-MS).

| # | Protein                                 | Function                                                                                                                   |
|---|-----------------------------------------|----------------------------------------------------------------------------------------------------------------------------|
| 1 | 3-hydroxyacyl-CoA dehydrogenase         | oxidoreductase (involved in fatty acid metabolic processes), acts on the CH-OH group of donor                              |
| 2 | 1-pyrroline-5-carboxylate dehydrogenase | oxidoreductase, acts on the CH-NH group of donors<br>icipates in glutamate metabolism and arginine and proline metabolism) |
| 3 | Phosphoribosylamine--glycine ligase     | purine biosynthesis                                                                                                        |
| 4 | Glutamate dehydrogenase                 | glutamate to $\alpha$ -ketoglutarate, and vice versa                                                                       |
| 5 | Ornithine--oxo-acid aminotransferase    | Catalyzes the interconversion of ornithine to glutamate semialdehyde                                                       |
| 6 | Heme peroxidase                         | a number of oxidative reactions                                                                                            |
| 7 | Transaldolase                           | non-oxidative phase of the pentose phosphate pathway                                                                       |

**Table S4.** *S. aureus* proteins with altered mobility after incubation with F105 *in vitro*.

| #  | Protein                                                    | Function                                                                                                                            |
|----|------------------------------------------------------------|-------------------------------------------------------------------------------------------------------------------------------------|
| 1  | transketolase                                              | pentose phosphate pathway                                                                                                           |
| 2  | enolase                                                    | glycolysis                                                                                                                          |
| 3  | formate--tetrahydrofolate ligase                           | purine biosynthesis                                                                                                                 |
| 4  | thymidine phosphorylase                                    | purine metabolism/pyrimidine metabolism                                                                                             |
| 5  | molecular chaperone GroEL                                  | folding of many proteins                                                                                                            |
| 6  | molecular chaperone DnaK                                   | Folding                                                                                                                             |
| 7  | cysteine synthase                                          | Biosynthesis of cysteine                                                                                                            |
| 8  | inosine-5-monophosphate dehydrogenase                      | biosynthesis of guanine nucleotides<br>redox signaling,                                                                             |
| 9  | thioredoxin reductase                                      | reduction of other proteins by cysteine<br>thiol-disulfide exchange                                                                 |
| 10 | arginase                                                   | arginine + H <sub>2</sub> O → ornithine + urea                                                                                      |
| 11 | CoA-disulfide reductase                                    | oxidoreductases, specifically those acting<br>on a sulfur group of donors with NAD <sup>+</sup> or<br>NADP <sup>+</sup> as acceptor |
| 12 | branched-chain alpha-keto acid<br>dehydrogenase subunit E2 | catalyzes a transfer of the acyl group from<br>the lipoyl moiety to coenzyme A (a<br>stoichiometric cofactor)                       |
| 13 | glutaryl-CoA dehydrogenase                                 | flavin adenine dinucleotide binding;<br>oxidoreductase activity, acting on the CH-<br>CH group of donors                            |
| 14 | succinyl-CoA synthetase subunit alpha                      | catalyzes the reversible reaction of<br>succinyl-CoA to succinate                                                                   |
| 15 | glyceraldehyde-3-phosphate dehydrogenase                   | glycolysis                                                                                                                          |
| 16 | serine hydroxymethyltransferase                            | simultaneous conversions of L-serine to<br>glycine and tetrahydrofolate (THF)                                                       |

## References

Otsubo, T.; Minami, A.; Fujii, H.; Taguchi, R.; Takahashi, T.; Suzuki, T.; Teraoka, F.; Ikeda, K. 2-(Benzothiazol-2-yl)-phenyl- $\beta$ -D-galactopyranoside derivatives as fluorescent pigment dyeing substrates and their application for the assay of  $\beta$ -D-galactosidase activities. *Bioorg. Med. Chem. Lett.* **2013**, *23*, 2245–2249.

Blazecka, P.G.; Belmont, D.; Curran, T.; Pflum, D.; Zhang, J. Further utilization of mucohalic acids: palladium-free, regioselective etherification and amination of  $\alpha,\beta$ -dihalo  $\gamma$ -methoxycarbonyloxy and  $\gamma$ -acetoxy butenolides. *Org. Lett.* **2003**, *5*, 5015–5017.

Sheldrick, G.M. SHELXT – Integrated space-group and crystal-structure determination. *Acta Cryst.* **2015**, *A71*, 3–8.

Sheldrick, G.M. Crystal structure refinement with SHELXL. *Acta Cryst.* **2015**, *C71*, 3–8.

Farrugia, L.J. WinGX and ORTEP for Windows: an update. *J. Appl. Cryst.* **2012**, *45*, 849–854.
